# Supplementary material for: Newly detected, virulent Toxoplasma gondii COUG strain causing fatal steatitis and toxoplasmosis in southern sea otters (Enhydra lutris nereis)
Source: Frontiers journal article supplement (doi:10.3389/fmars.2023.1116899), 2023-03-22
Supplement: Image_1.pdf [file Image_1.pdf]

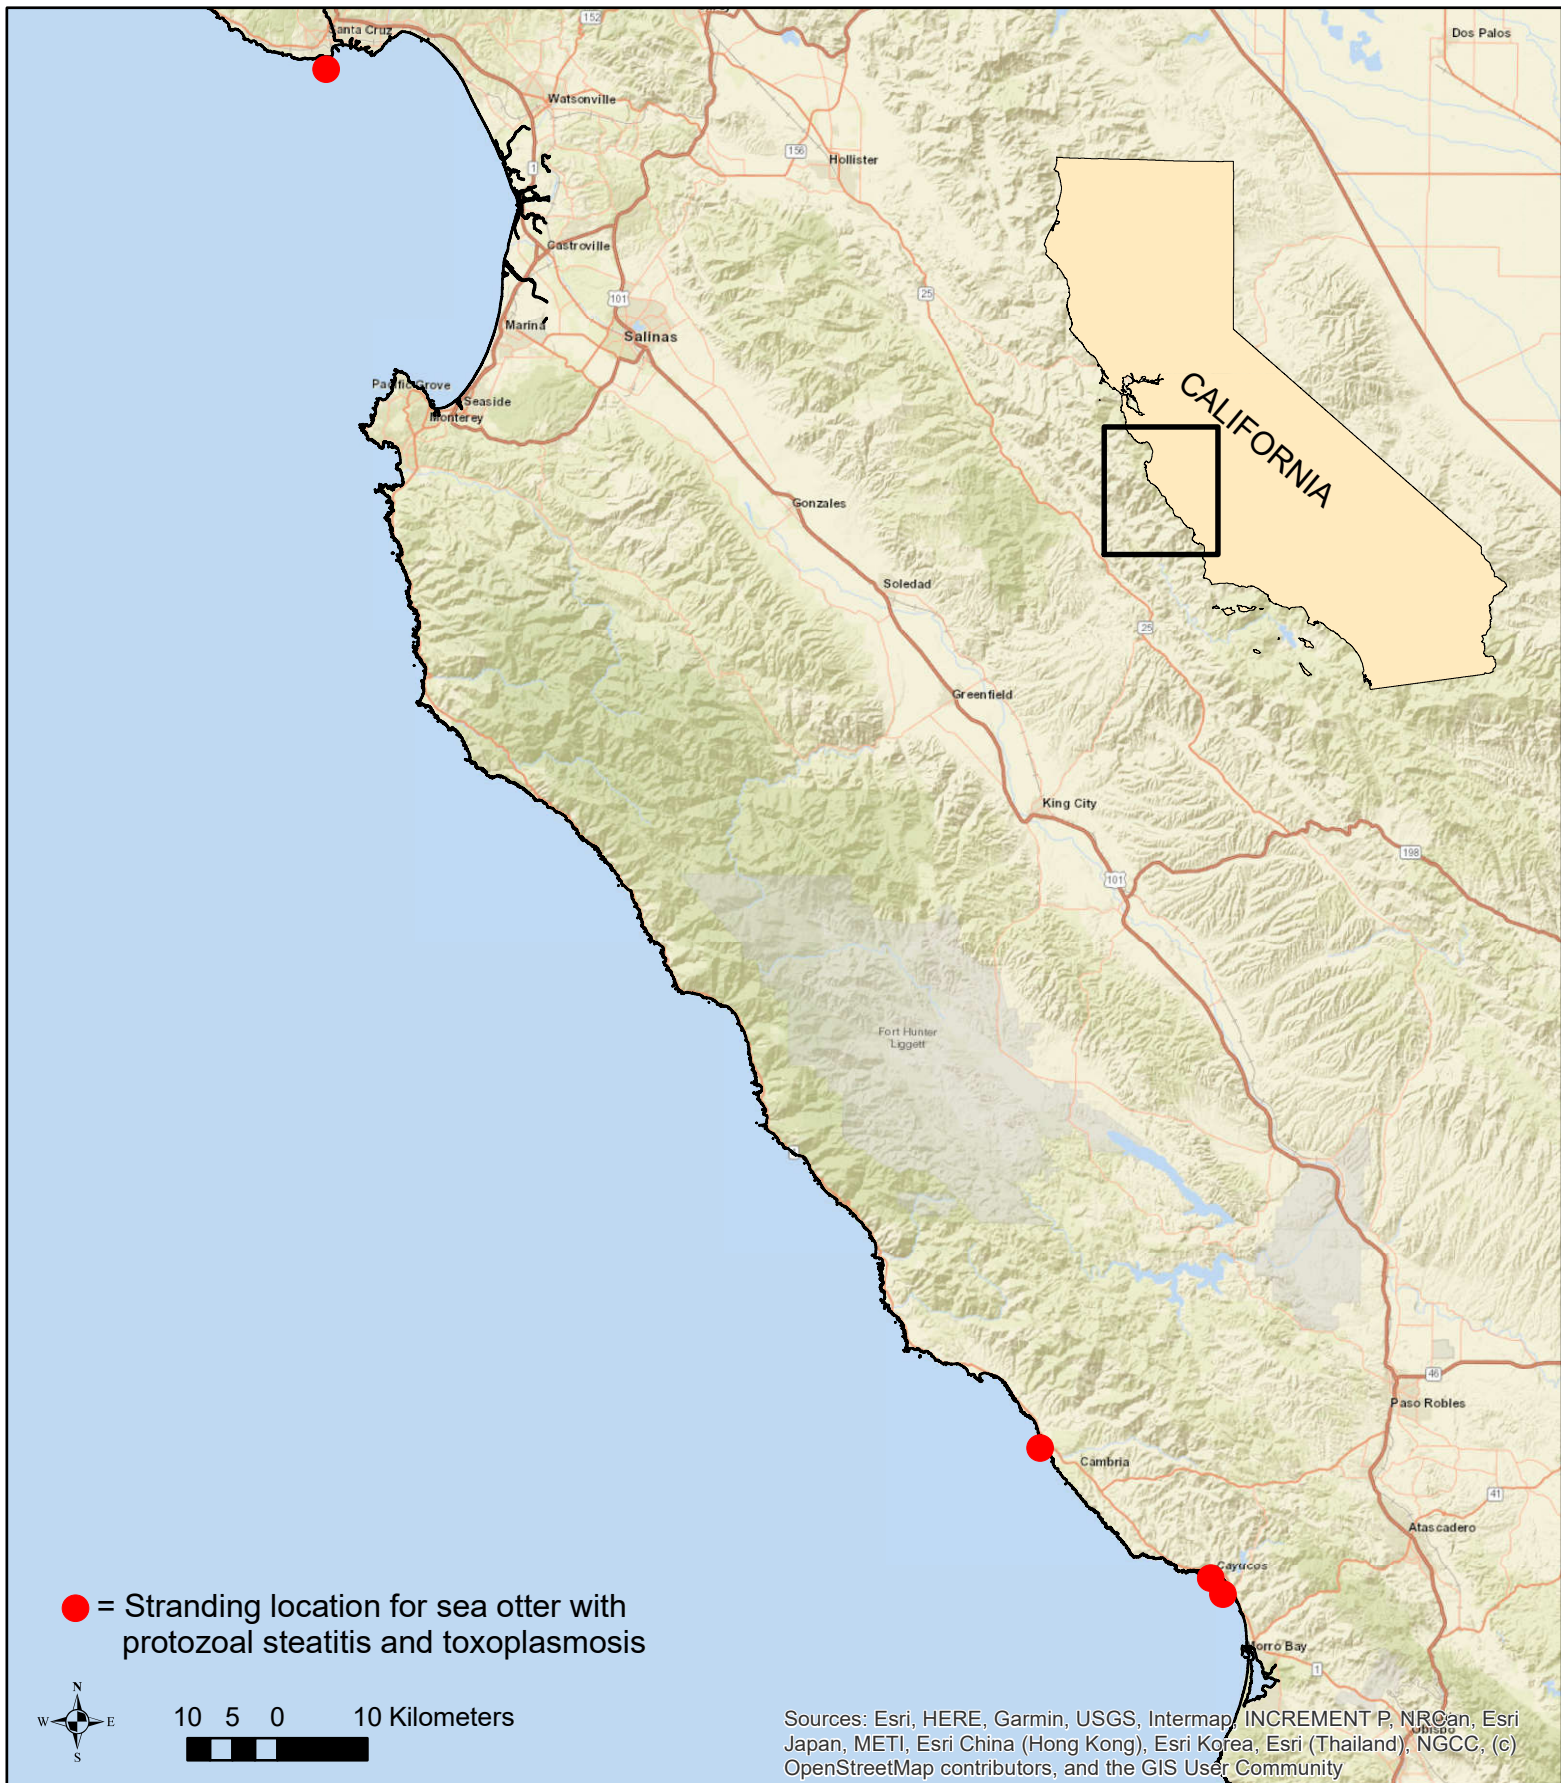

Supplementary Figure 1: Map of the central California coast, showing the stranding locations of four southern sea otters (*Enhydra lutris nereis*) with fatal *Toxoplasma gondii*-associated steatitis and toxoplasmosis.
